# Supplementary material for: Effect of Industrial Pollution in Puchuncaví Valley on the Medicinal Properties of Senecio fistulosus Poepp. ex Les (Asteraceae): Content of Phytoconstituents and Their Antioxidant and Cytotoxic Activities
Source: MDPI journal article supplement (doi:10.3390/molecules28207038), 2023-10-12

**Supplementary Materials:**

**Table S1.** Studies reported in literature on extraction of secondary metabolites.

| Specie                              | Phe.                            | Flav.                          | Ant.<br>(mg/EE) | DPPH<br>(mg/mL)<br>IC <sub>50</sub> | FRAP<br>(TEACmM) | TRAP<br>(TEACmM) | Solvent                                     | Reference                            |
|-------------------------------------|---------------------------------|--------------------------------|-----------------|-------------------------------------|------------------|------------------|---------------------------------------------|--------------------------------------|
| <i>S. fistulosus</i><br><i>wild</i> | 169.48 ±<br>1.64<br>mg/L<br>GAE | 15.42 ±<br>0.97<br>mg/L<br>QE  | 31.08 ±<br>1.29 | 1.89 ±<br>0.01                      | 0.6 ± 0.04       | 0.016 ± 0.00     | Dichloromethane                             | This study                           |
| <i>S. fistulosus</i><br>Commercial  | 95.39 ±<br>1.22<br>mg/L<br>GAE  | 13.10 ±<br>0.82<br>mg/L<br>QE  | 9.63 ±<br>1.46  | 4.24 ±<br>0.07                      | 0.54 ± 0.02      | 0.016 ± 0.00     | Ethyl acetate                               | This study                           |
| <i>S. hoggariensis</i>              | 100.27 ±<br>0.74 µg<br>GAE/mg   | 80.06 ±<br>1.14<br>µg<br>QE/mg | -               | 46.40 ±<br>3.95 (µg<br>/mL)         | -                | -                | Ethyl acetate<br>extract                    | Arab, Y.,<br>et al., 2022            |
| <i>S. cineraria</i>                 | -                               | 60.16<br>mg/g<br>EQ            | -               | 0.35<br>mg/mL                       | -                | -                | Polar extract                               | Ababsa,<br>ZA., et al.,<br>2018      |
| <i>S. glaucus</i>                   | 0,11<br>µg/g<br>GAE             | 1,17<br>µg/g<br>QE             | -               | 10 µg by<br>30.42%                  | -                | -                | Hexane-<br>Dichloromethane<br>(1:1) extract | Mohamed,<br>AEHH., et<br>al., (2022) |

**Table S2.** Studies reported in the literature on compounds found in the GC–MS technique.

| Secondary metabolite                    | Type                      | Observation                                                                                                                                                                                                                                         | Reference                                                                                                                                                       |
|-----------------------------------------|---------------------------|-----------------------------------------------------------------------------------------------------------------------------------------------------------------------------------------------------------------------------------------------------|-----------------------------------------------------------------------------------------------------------------------------------------------------------------|
| Indolizine                              | Alkaloid                  | Pharmaceutical products with significant anti-inflammatory, analgesic, antimicrobial, antiexudative, antidiabetic, antimiticoviral, anticancer, hypoglycemic and other activities.                                                                  | Monreal-Corona <i>et al.</i> , 2023; Flitsch <i>et al.</i> , 1984; Salem <i>et al.</i> , 2018; Harma, V., & Kumar, V. 2014; Basavaraj, M., <i>et al.</i> , 2022 |
| Germacrene D                            | Sesquiterpeno             | Antimicrobial and insecticidal properties, although they also play a role as insect pheromones.                                                                                                                                                     | Li <i>et al.</i> , 2021                                                                                                                                         |
| Neophytadiene                           | Diterpene                 | Antimicrobial properties                                                                                                                                                                                                                            | Cáceres <i>et al.</i> , 2015                                                                                                                                    |
| Phytol                                  | isoprenoid alcohol        | Its derivatives present a wide range of biological activities such as, anxiolytic, cytotoxic, metabolism modulating, antioxidant, autophagy and apoptosis inducing, antinociceptive, anti-inflammatory, immunomodulatory and antimicrobial effects. | Ding <i>et al.</i> , 2021; Gutbrod <i>et al.</i> , 2021; Sanjeev <i>et al.</i> , 2020; Islam, MT., <i>et al.</i> , 2018; Islam, MT., <i>et al.</i> , 2018       |
| Senecionine                             | Alkaloid                  | Is one of the most studied hepatotoxic and carcinogenic                                                                                                                                                                                             | Xia <i>et al.</i> , 2020; Blanco, C., <i>et al.</i> , 2020; Monreal-Corona, <i>et al.</i> , 2023; Sanjeev <i>et al.</i> , 2020                                  |
| Platyphylline                           | Alkaloid                  | Defense mechanism against herbivores.                                                                                                                                                                                                               | Alves Paiva 2004; Ebmeyer 2019                                                                                                                                  |
| Hexadecanoic acid                       | Saturated free fatty acid | Positive effects on melanoma metastasis in mice.                                                                                                                                                                                                    | Lv <i>et al.</i> , 2023                                                                                                                                         |
| 9,12,15-Octadecatrienoic acid. (Z,Z,Z)- | Linolenic Acid            | It possesses beneficial in diabetes, cancer and heart disease, in addition to antifungal activity.                                                                                                                                                  | Javaid <i>et al.</i> , 2023; Prasanna 2017                                                                                                                      |
| 1-Heptatriacotanol                      | alcoholic compound        | Could prevent cancer development                                                                                                                                                                                                                    | Oluwasina <i>et al.</i> , 2023                                                                                                                                  |

**Figure S1.** GC-MS chromatograms of the dichloromethane extract of the aerial part of Wild *S. fistulosus*.

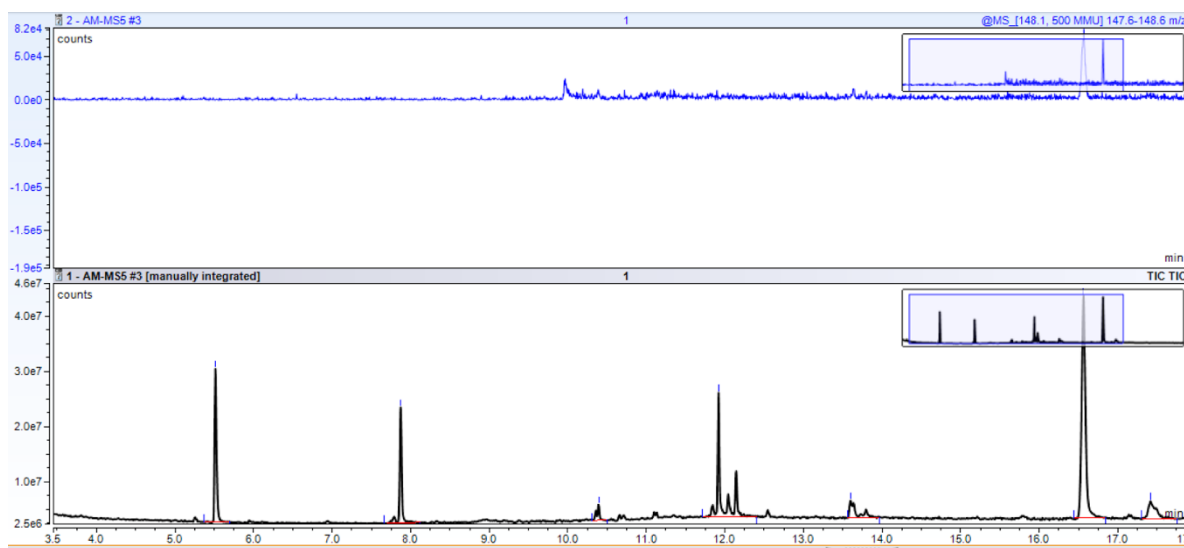

**Figure S2.** GC-MS chromatograms of the ethyl acetate extract of the aerial part of Wild *S. fistulosus*.

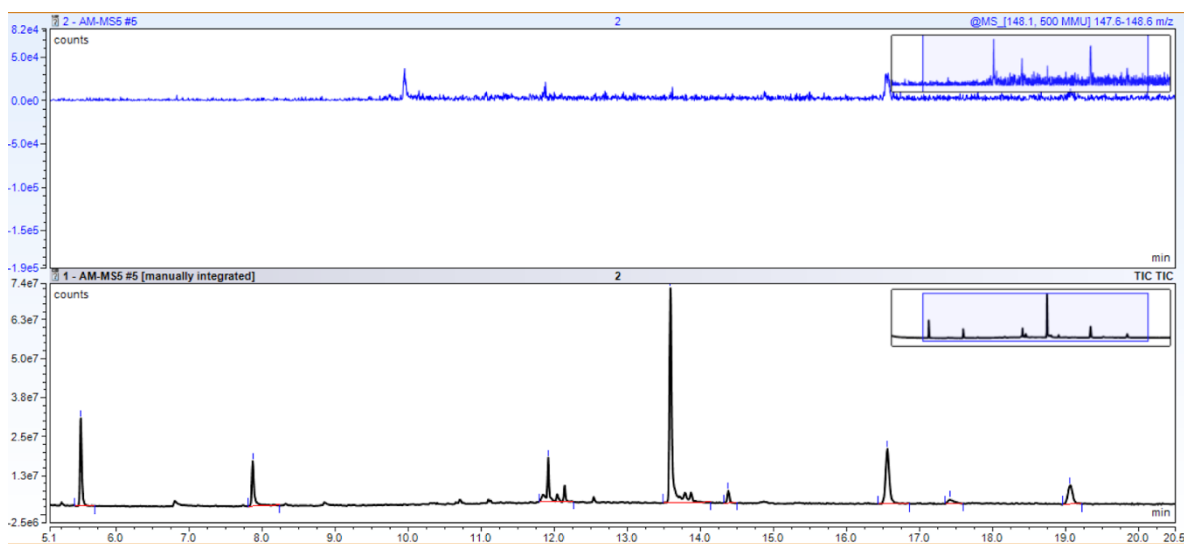

**Figure S3.** GC-MS chromatograms of the dichloromethane extract of the aerial part of Commercial *S. fistulosus*.

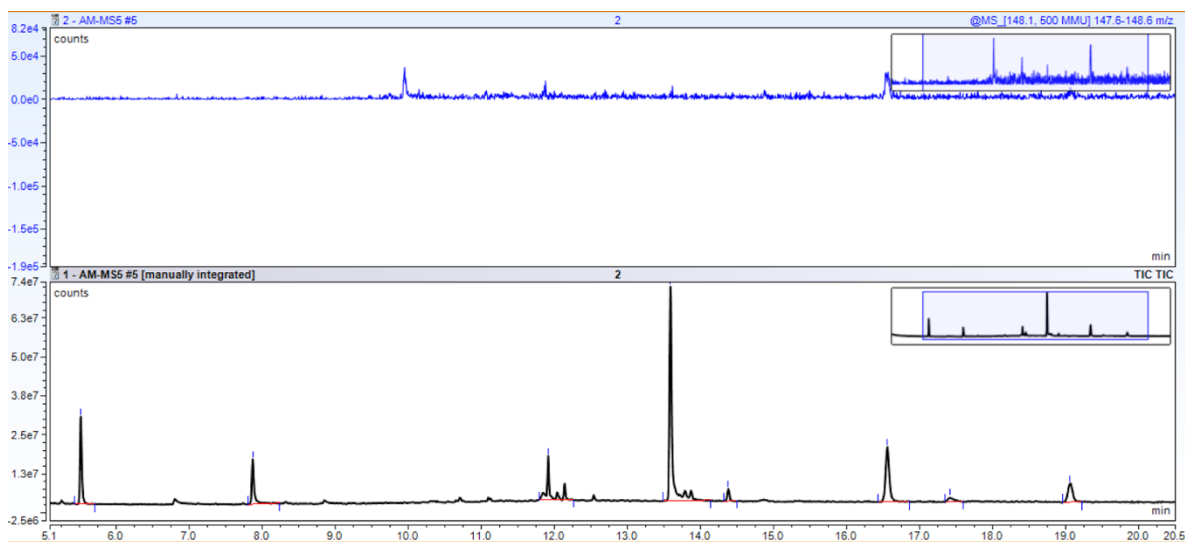

**Figure S4.** GC-MS chromatograms of the ethyl acetate extract of the aerial part of Commercial *S. fistulosus*.

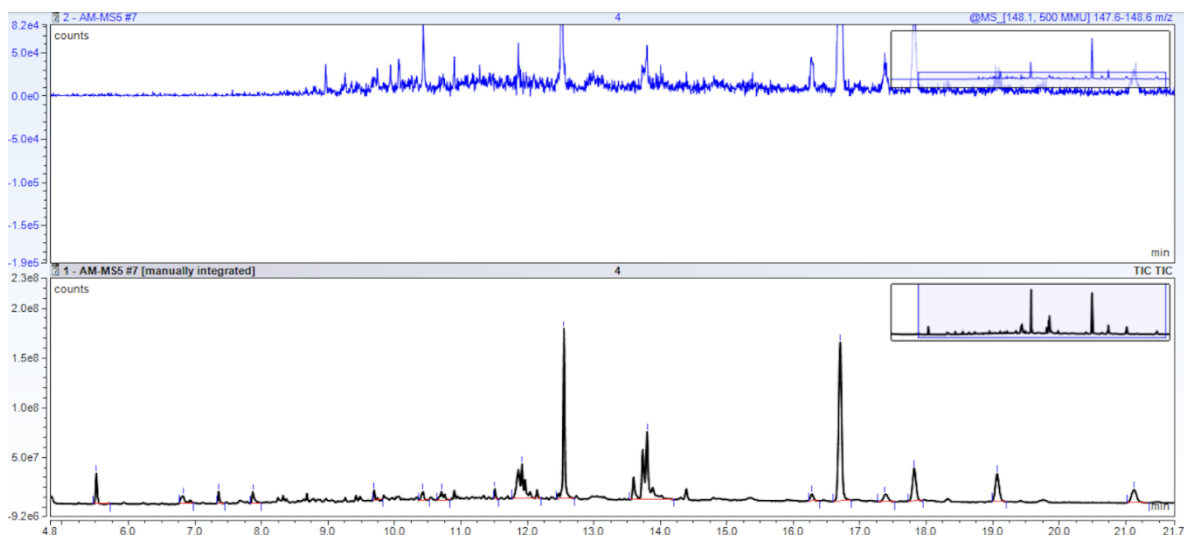

Supplement: s1 [file s1]
